# Supplementary material for: Exploring the Chemical Profiles and Biological Values of Two Spondias Species (S. dulcis and S. mombin): Valuable Sources of Bioactive Natural Products
Source: MDPI journal article supplement (doi:10.3390/antiox10111771), 2021-11-05
Supplement: s1 [file s1]

# Exploring the Chemical Profiles and Biological Values of Two *Spondias* Species (*S. dulcis* and *S. mombin*): Valuable Sources of Bioactive Natural Products

Kouadio Ibrahime Sinan <sup>1</sup>, Gokhan Zengin <sup>1,\*</sup>, Dimitrina Zheleva-Dimitrova <sup>2</sup>, Reneta Gevrenova <sup>2</sup>, Marie Carene Nancy Picot-Allain <sup>3</sup>, Stefano Dall'Acqua <sup>4,\*</sup>, Tapan Behl <sup>5</sup>, Bey Hing Goh <sup>6,7</sup>, Patrick Tang Siah Ying <sup>8</sup> and Mohamad Fawzi Mahomoodally <sup>3,\*</sup>

<sup>1</sup> Biochemistry and Physiology Research Laboratory, Department of Biology, Science Faculty, Selcuk University, Konya 42130, Turkey; sinankouadio@gmail.com

<sup>2</sup> Department of Pharmacognosy, Faculty of Pharmacy, Medical University—Sofia, 2 Dunav Str., 1000 Sofia, Bulgaria; dzheleva@pharmfac.mu-sofia.bg (D.Z.-D.); rgevrenova@pharmfac.mu-sofia.bg (R.G.)

<sup>3</sup> Department of Health Sciences, Faculty of Medicine and Health Sciences, University of Mauritius, Réduit 80837, Mauritius; picotcarene@yahoo.com

<sup>4</sup> Department of Pharmaceutical and Pharmacological Sciences, University of Padova, Via Marzolo 5, 35131 Padova, Italy

<sup>5</sup> Chitkara College of Pharmacy, Chitkara University, Punjab 140401, India; tapanbehl31@gmail.com

<sup>6</sup> Biofunctional Molecule Exploratory (BMEX) Research Group, School of Pharmacy, Monash University Malaysia, Bandar Sunway 47500, Malaysia; goh.bey.hing@monash.edu

<sup>7</sup> College of Pharmaceutical Sciences, Zhejiang University, Hangzhou 310058, China

<sup>8</sup> Chemical Engineering Discipline, School of Engineering, Monash University, Selangor 47500, Malaysia; patrick.tang@monash.edu

\* Correspondence: gokhanzengin@selcuk.edu.tr (G.Z.); stefano.dallacqua@unipd.it (S.D.); f.mahomoodally@uom.ac.mu (M.F.M.)

## Preparation of extracts

Briefly, for the maceration (MAC), plant materials (5 g) were extracted with 100 ml of methanol or ethyl acetate for 24 h at a room temperature. In MAC, the extractions were performed with stir and not-stir. In the Soxhlet extraction procedure, plant materials (5 g) were extracted with 100 ml of methanol or ethyl acetate in a Soxhlet apparatus for 6 h. In the infusion extraction procedure, plant materials (5 g) were kept in boiled water (100 ml) for 15 min and afterwards filtered. Ethyl acetate and methanol extracts were concentrated using rotary-evaporator under vacuum. Infusions were dried using lyophilizator. All prepared extracts were stored in the dark at + 4 °C until further analysis.

**Table S1.** Eigen values and percentage of explained variance of each principal component (PC).

| Principal component                  | PC1   | PC2   | PC3   | PC4  |
|--------------------------------------|-------|-------|-------|------|
| Eigenvalues                          | 6.91  | 2.29  | 1.94  | 1.07 |
| Proportion of explained variance (%) | 46.07 | 15.31 | 12.95 | 7.14 |
